# Supplementary material for: Patterns of Telehealth Visits After the COVID‐19 Pandemic Among Individuals With or at Risk for Cardiovascular Disease in the United States
Source: PubMed Central journal article supplement — J Am Heart Assoc. 2024 Aug 29;13(17):e036475. doi: 10.1161/JAHA.124.036475 (PMC11646522; doi:10.1161/jaha.124.036475), 2024-08-29
Supplement: JAH3-13-e036475-s001.pdf [file JAH3-13-e036475-s001.pdf]

# Supplemental Material

**Table S1. Telehealth Survey Questions.**

| Survey Question                                                                                                                                                                                                                                                        | Responses                                                                                                                             |
|------------------------------------------------------------------------------------------------------------------------------------------------------------------------------------------------------------------------------------------------------------------------|---------------------------------------------------------------------------------------------------------------------------------------|
| In the past 12 months, did you receive care from a doctor or health professional using telehealth?                                                                                                                                                                     | Yes by video, Yes by phone call, Yes some by video and some by phone, No telehealth visit                                             |
| In the past 12 months, were you offered the option to have a telehealth visit for any medical care you tried to schedule?                                                                                                                                              | Yes, No , Did not try to schedule a visit                                                                                             |
| Did you choose not to participate in a telehealth visit because you preferred to have the appointment in person?                                                                                                                                                       | Yes, No                                                                                                                               |
| Did you choose not to participate in a telehealth visit because you were concerned about the privacy of telehealth visits?                                                                                                                                             | Yes, No                                                                                                                               |
| Did you choose not to participate in a telehealth visit because you thought the telehealth technology would be difficult to use?                                                                                                                                       | Yes, No                                                                                                                               |
| Why did you choose a telehealth visit(s) for yourself? The health care provider recommended or required the visit use telehealth.                                                                                                                                      | Yes, No                                                                                                                               |
| Why did you choose a telehealth visit(s) for yourself? I wanted advice about whether I needed in-person medical care.                                                                                                                                                  | Yes, No                                                                                                                               |
| Why did you choose a telehealth visit(s) for yourself? I wanted to avoid possible infection at the doctor's office or hospital (for example, COVID-19 or flu).                                                                                                         | Yes, No                                                                                                                               |
| Why did you choose a telehealth visit(s) for yourself? It was more convenient than going to the doctor (for example, less travel or wait times)                                                                                                                        | Yes, No                                                                                                                               |
| Why did you choose a telehealth visit(s) for yourself? I could include family or other caregivers in my appointment.                                                                                                                                                   | Yes, No                                                                                                                               |
| What was the primary reason for your most recent telehealth visit? (Annual visit, minor illness/acute care, managing chronic health condition/disease, medical emergency, mental health/behavioral, other)                                                             | Annual visit, minor illness/acute care, managing chronic health condition/disease, medical emergency, mental health/behavioral, other |
| In general, how much do you agree or disagree with the following statements regarding your telehealth visit(s)? I had technical problems with my telehealth visit(s) (for example, difficulty using the technology, trouble seeing or hearing my health care provider) | Strongly agree, somewhat agree, somewhat disagree, strongly disagree                                                                  |

In general, how much do you agree or disagree with the following statements regarding your telehealth visit(s)? The care I received through telehealth was as good as a regular in-person visit

Strongly agree,  
somewhat agree,  
somewhat  
disagree, strongly  
disagree

**Table S2. Demographic Characteristics of Video vs. Audio Telehealth Visit Use in Patients with CVD.**

|                                | <b>No Telehealth<br/>n=298</b>                 | <b>Video<br/>n=167</b> | <b>Audio Only<br/>n=133</b> | <b>P-value<br/><math>\chi^2</math><br/>for<br/>comparison<br/>of video vs.<br/>audio</b> |
|--------------------------------|------------------------------------------------|------------------------|-----------------------------|------------------------------------------------------------------------------------------|
|                                | <b>% US Adult Weighted Population (95% CI)</b> |                        |                             |                                                                                          |
| <b>Age, years</b>              |                                                |                        |                             |                                                                                          |
| 18–34                          | 5.0 (2.0 -12.0)                                | 9.3 (4.1- 19.7)        | 2.9 (0.4-18.1)              | P= 0.1989                                                                                |
| 35–49                          | 11.3 (5.7-21.0)                                | 15.3 (8.5-26.1)        | 10.3 (5.1-19.9)             |                                                                                          |
| 50–64                          | 26.4 (18.2-36.5)                               | 33.4 (22.4-46.6)       | 25.6 (16.4-37.7)            |                                                                                          |
| ≥65                            | 57.4 (47.7-66.5)                               | 42.0 (29.6-55.4)       | 61.1 (48.5-72.4)            |                                                                                          |
| <b>Sex</b>                     |                                                |                        |                             |                                                                                          |
| Women                          | 36.0 (28.6-44.2)                               | 38.0 (28.6-48.5)       | 50.3 (37.2-63.4)            | P = 0.1790                                                                               |
| Men                            | 64.0 (55.8-71.4)                               | 62.0 (51.5-71.4)       | 49.7 (36.6-62.8)            |                                                                                          |
| <b>Race/Ethnicity</b>          |                                                |                        |                             |                                                                                          |
| Non-Hispanic White             | 65.0 (54.0-74.7)                               | 71.9 (59.0-82.0)       | 68.5 (55.1-79,.4)           | P=0.5068                                                                                 |
| Non-Hispanic Black             | 14.4 (8.6-23.2)                                | 13.0 (7.4-22.0)        | 9.5 (4.8-17.9)              |                                                                                          |
| Hispanic                       | 9.8 (5.7-16.3)                                 | 9.3 (4.3-19.2)         | 14.5 (6.8-28.3)             |                                                                                          |
| Non-Hispanic Asian             | 7.8 (2.4-22.3)                                 | 0.3 (0.1-1.2)          | 2.9 (0.8-9.9)               |                                                                                          |
| Non-Hispanic other             | 3.0 (1.3-6.5)                                  | 5.4 (1.5-17.7)         | 4.5 (1.0-17.4)              |                                                                                          |
| <b>Education</b>               |                                                |                        |                             |                                                                                          |
| Less than high school          | 19.6 (12.1-30.2)                               | 5.6 (1.9-15.5)         | 10.8 (4.9-22.1)             | P=0.4628                                                                                 |
| High school graduate           | 21.2 (15.0-29.2)                               | 17.9 (10.1-29.7)       | 25.2 (15.5-38.2)            |                                                                                          |
| Some college                   | 39.1 (30.7-48.3)                               | 50.1 (36.1-64.1)       | 41.8 (30.1-54.4)            |                                                                                          |
| Bachelor's degree or more      | 20.0 (14.8-26.6)                               | 26.4 (17.9-37.2)       | 22.2 (14.7-32.1)            |                                                                                          |
| <b>Annual household income</b> |                                                |                        |                             |                                                                                          |
| <\$20,000                      | 24.9 (17.4-34.2)                               | 23.2 (14.6-34.8)       | 22.2 (13.5-34.3)            |                                                                                          |

|                                     |                  |                  |                   |            |
|-------------------------------------|------------------|------------------|-------------------|------------|
| \$20,000 to <\$35,000               | 13.1 (8.1-20.3)  | 5.6 (3.0-10.6)   | 13.0 (6.8-23.5)   | P=0.4030   |
| \$35,000 to <\$50,000               | 14.9 (9.6-22.3)  | 16.1 (8.9-27.4)  | 13.9 (6.8-23.5)   |            |
| \$50,000 to <\$75,000               | 20.0 (12.2-31.0) | 11.8 (7.0-27.4)  | 18.5 (10.0-31.7)  |            |
| ≥\$75,000                           | 27.2 (19.3-36.8) | 43.3 (31.8-55.6) | 32.4 (19.7-48.3)  |            |
| <b>Location</b>                     |                  |                  |                   |            |
| Urban                               | 81.4 (75.0-86.5) | 72.8 (58.1-83.7) | 87.4 (78.7- 92.9) | P =0.0387  |
| Rural                               | 18.6 (13.5-25.0) | 27.2 (16.3-41.9) | 12.6 (7.1-21.3)   |            |
| <b>Frequency of Provider Visits</b> |                  |                  |                   |            |
| 0                                   | 9.0 (5.1-15.2)   | 3.3 (0.8-13.4)   | 6.7 (2.7-15.6)    | P = 0.1531 |
| 1-4                                 | 60.6 (51.9-68.6) | 42.2 (28.7-57.0) | 48.1 (35.3-61.1)  |            |
| 5-9                                 | 15.0 (10.6-20.7) | 18.5 (11.6-28.2) | 27.3 (18.0-39.0)  |            |
| ≥10                                 | 15.5 (9.8-23.8)  | 35.9 (24.4-49.3) | 18.0 (10.4-29.2)  |            |

Demographic characteristics of the study population were compared between patients with CVD that had video vs audio-only telehealth visit. P-values were calculated using the Chi-Squared Test.

**Table S3. Demographic Characteristics of Video vs. Audio Telehealth Visit Use in Patients with CVD Risk Facts.**

|                                | <b>No Telehealth<br/>N=1979</b>                | <b>Video<br/>N=935</b> | <b>Audio Only<br/>N=495</b> | <b>P-value<br/><math>\chi^2</math></b> |
|--------------------------------|------------------------------------------------|------------------------|-----------------------------|----------------------------------------|
|                                | <b>% US Adult Weighted Population (95% CI)</b> |                        |                             |                                        |
| <b>Age, years</b>              |                                                |                        |                             |                                        |
| 18–34                          | 20.1 (16.4 -24.4)                              | 17.3 (11.1- 25.9)      | 10.6 (6.8-16.2)             | P=<br>0.0010                           |
| 35–49                          | 23.1 (19.7-26.9)                               | 32.3 (26.3-38.9)       | 26.1 (23.2-29.3)            |                                        |
| 50–64                          | 30.4 (27.0-34.1)                               | 31.8 (26.1-38.1)       | 27.5 (22.3-34.5)            |                                        |
| ≥65                            | 26.4 (23.8-29.2)                               | 18.6 (15.5-22.2)       | 35.4 (30.6-40.6)            |                                        |
| <b>Sex</b>                     |                                                |                        |                             |                                        |
| Women                          | 48.0 (44.0-52.1)                               | 56.7 (49.6-63.6)       | 55.9 (48.2-63.4)            | P =<br>0.8788                          |
| Men                            | 52.0 (47.9-56.0)                               | 43.3 (36.4-50.4)       | 44.1 (36.6-51.8)            |                                        |
| <b>Race/Ethnicity</b>          |                                                |                        |                             |                                        |
| Non-Hispanic White             | 60.3 (55.5-64.8)                               | 59.7 (52.2-66.8)       | 54.4 (46.4-62.2)            | P=0.0215                               |
| Non-Hispanic Black             | 13.2 (11.1-15.6)                               | 13.4 (10.2-17.6)       | 12.1 (9.0-16.1)             |                                        |
| Hispanic                       | 18.5 (15.2-22.3)                               | 14.2 (11.1-18.0)       | 24.8 (19.2-31.5)            |                                        |
| Non-Hispanic Asian             | 4.1 (2.0-8.3)                                  | 3.3 (2.1-5.2)          | 5.0 (2.1-11.6)              |                                        |
| Non-Hispanic other             | 4.0 (2.8-5.6)                                  | 9.4 (4.4-18.8)         | 3.6 (1.8-7.4)               |                                        |
| <b>Education</b>               |                                                |                        |                             |                                        |
| Less than high school          | 8.7 (6.5-11.4)                                 | 5.1 (2.3-11.0)         | 8.0 (5.6-11.4)              | P=0.1051                               |
| High school graduate           | 24.9 (21.9-28.1)                               | 18.5 (14.3-23.7)       | 26.9 (20.8-33.9)            |                                        |
| Some college                   | 44.1 (39.6-48.7)                               | 44.7 (39.3-50.2)       | 36.4 (28.8-34.6)            |                                        |
| Bachelor's degree or more      | 22.3 (19.5-25.3)                               | 31.6 (27.5-36.1)       | 28.7 (23.4-34.6)            |                                        |
| <b>Annual household income</b> |                                                |                        |                             |                                        |
| <\$20,000                      | 15.7 (13.1-18.6)                               | 11.4 (8.2-15.6)        | 17.5 (12.9-23.3)            | P=0.0184                               |
| \$20,000 to <\$35,000          | 13.9 (11.6-16.6)                               | 11.2 (7.4-16.6)        | 17.1 (12.3-23.3)            |                                        |
| \$35,000 to <\$50,000          | 13.5 (11.0-16.4)                               | 11.5 (7.4-16.6)        | 14.4 (10.2-19.9)            |                                        |
| \$50,000 to <\$75,000          | 19.2 (15.5-23.4)                               | 17.5 (14.1-21.5)       | 16.6 (11.9-22.7)            |                                        |

|                                         |                  |                  |                  |              |
|-----------------------------------------|------------------|------------------|------------------|--------------|
| ≥\$75,000                               | 37.7 (33.6-42.0) | 48.4 (42.1-54.8) | 34.4 (27.7-41.7) |              |
| <b>Location</b>                         |                  |                  |                  |              |
| Urban                                   | 83.4 (80.9-85.6) | 84.2 (75.9-90.0) | 87.1 (81.7-91.0) | P<br>=0.4898 |
| Rural                                   | 16.6 (14.4-19.1) | 15.8 (10.0-24.1) | 12.9 (9.0-18.3)  |              |
| <b>Frequency of<br/>Provider Visits</b> |                  |                  |                  |              |
| 0                                       | 19.0 (15.7-22.7) | 2.0 (1.2-3.2)    | 5.2 (2.9-9.2)    | P<br>=0.0103 |
| 1-4                                     | 64.9 (61.1-68.4) | 60.2 (54.4-65.8) | 67.5 (61.0-73.4) |              |
| 5-9                                     | 9.9 (8.0-12.3)   | 22.5 (17.7-28.2) | 17.7 (13.5-22.7) |              |
| ≥10                                     | 6.2 (4.9-7.9)    | 15.2 (11.9-19.3) | 9.6 (6.5-14.0)   |              |

Demographic characteristics of the study population were compared between patients with CVD Risk Factors that had video vs audio-only telehealth visit. P-values were calculated using the Chi-Squared Test.

**Figure S1. CVD Status Across Demographic and Socioeconomic Groups.**

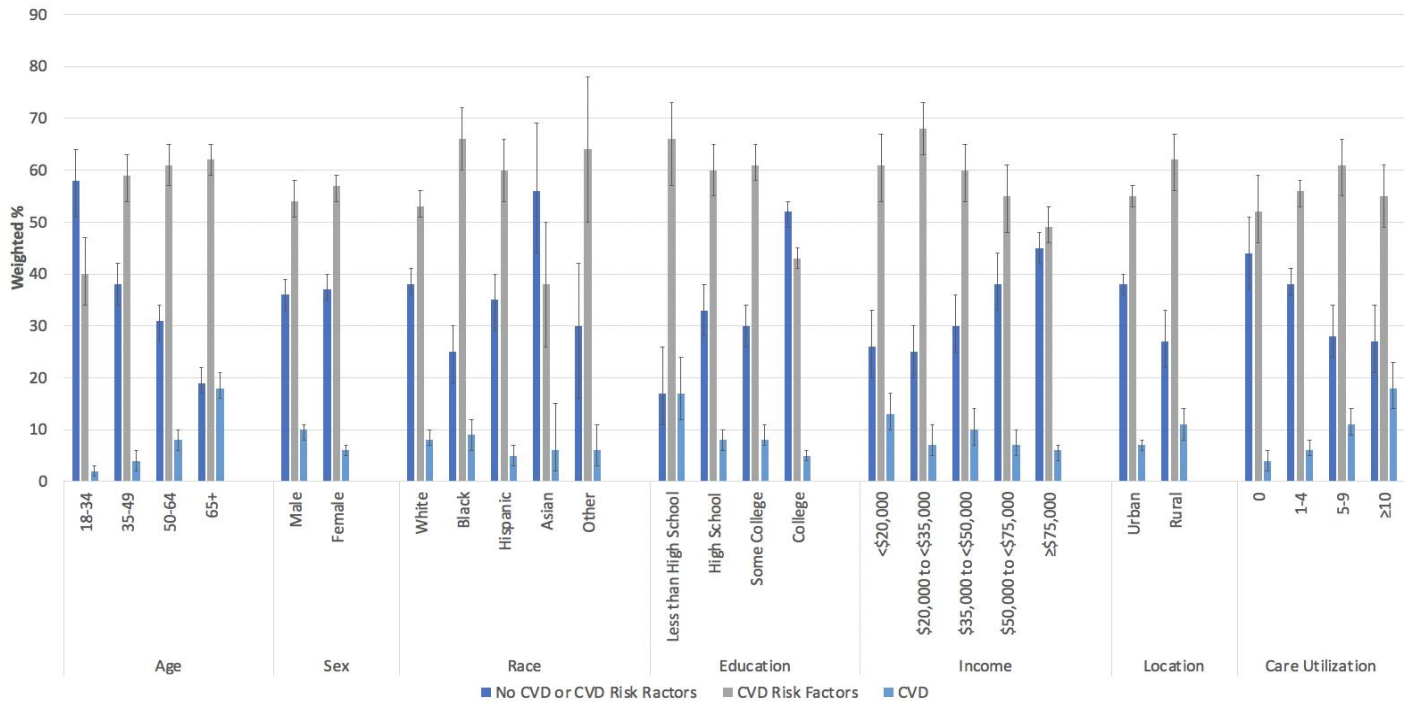

Demographic characteristics of the study population were compared between patients based on CVD status. The weighted percentage reported describes the proportion of each demographic variable with no CVD or CVD Risk Factors, CVD Risk Factors, or CVD.
